# Supplementary material for: The Oxygen and Glucose Deprivation of Immature Cells of the Nervous System Exerts Distinct Effects on Mitochondria, Mitophagy, and Autophagy, Depending on the Cells’ Differentiation Stage
Source: MDPI journal article supplement (doi:10.3390/brainsci13060910), 2023-06-04

# FUNDC1

Chemiluminescence

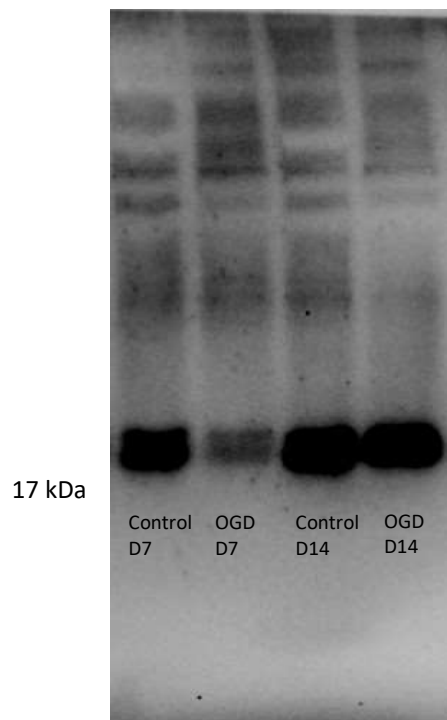

Stain free membrane

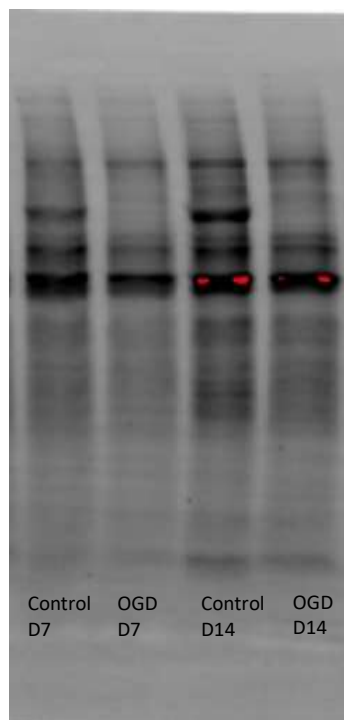

Chemiluminescence

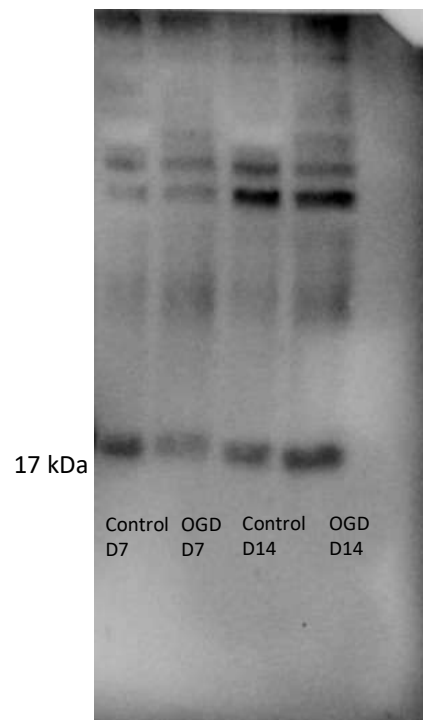

Stain free membrane

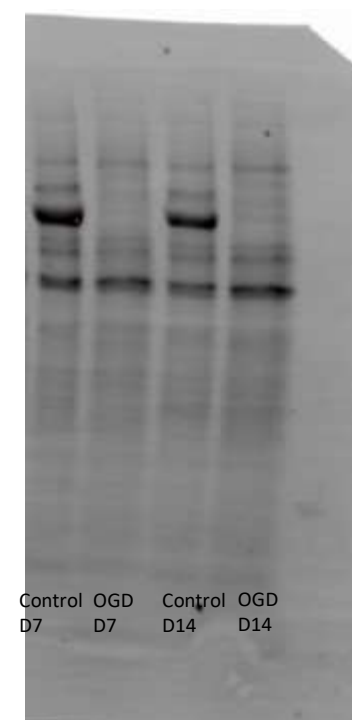

Chemiluminescence

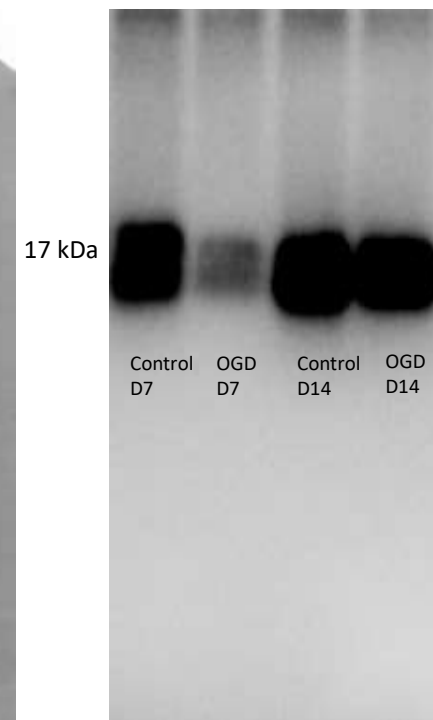

Stain free membrane

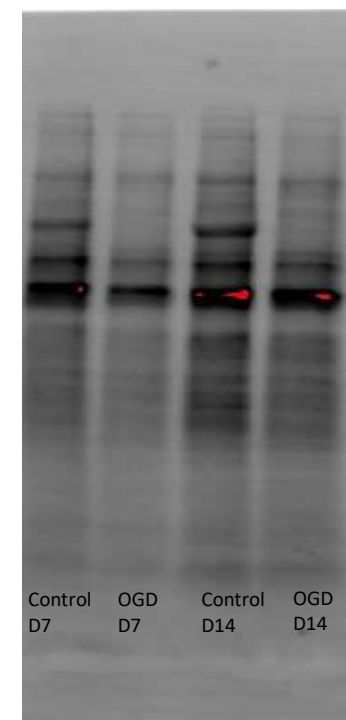

# PINK1

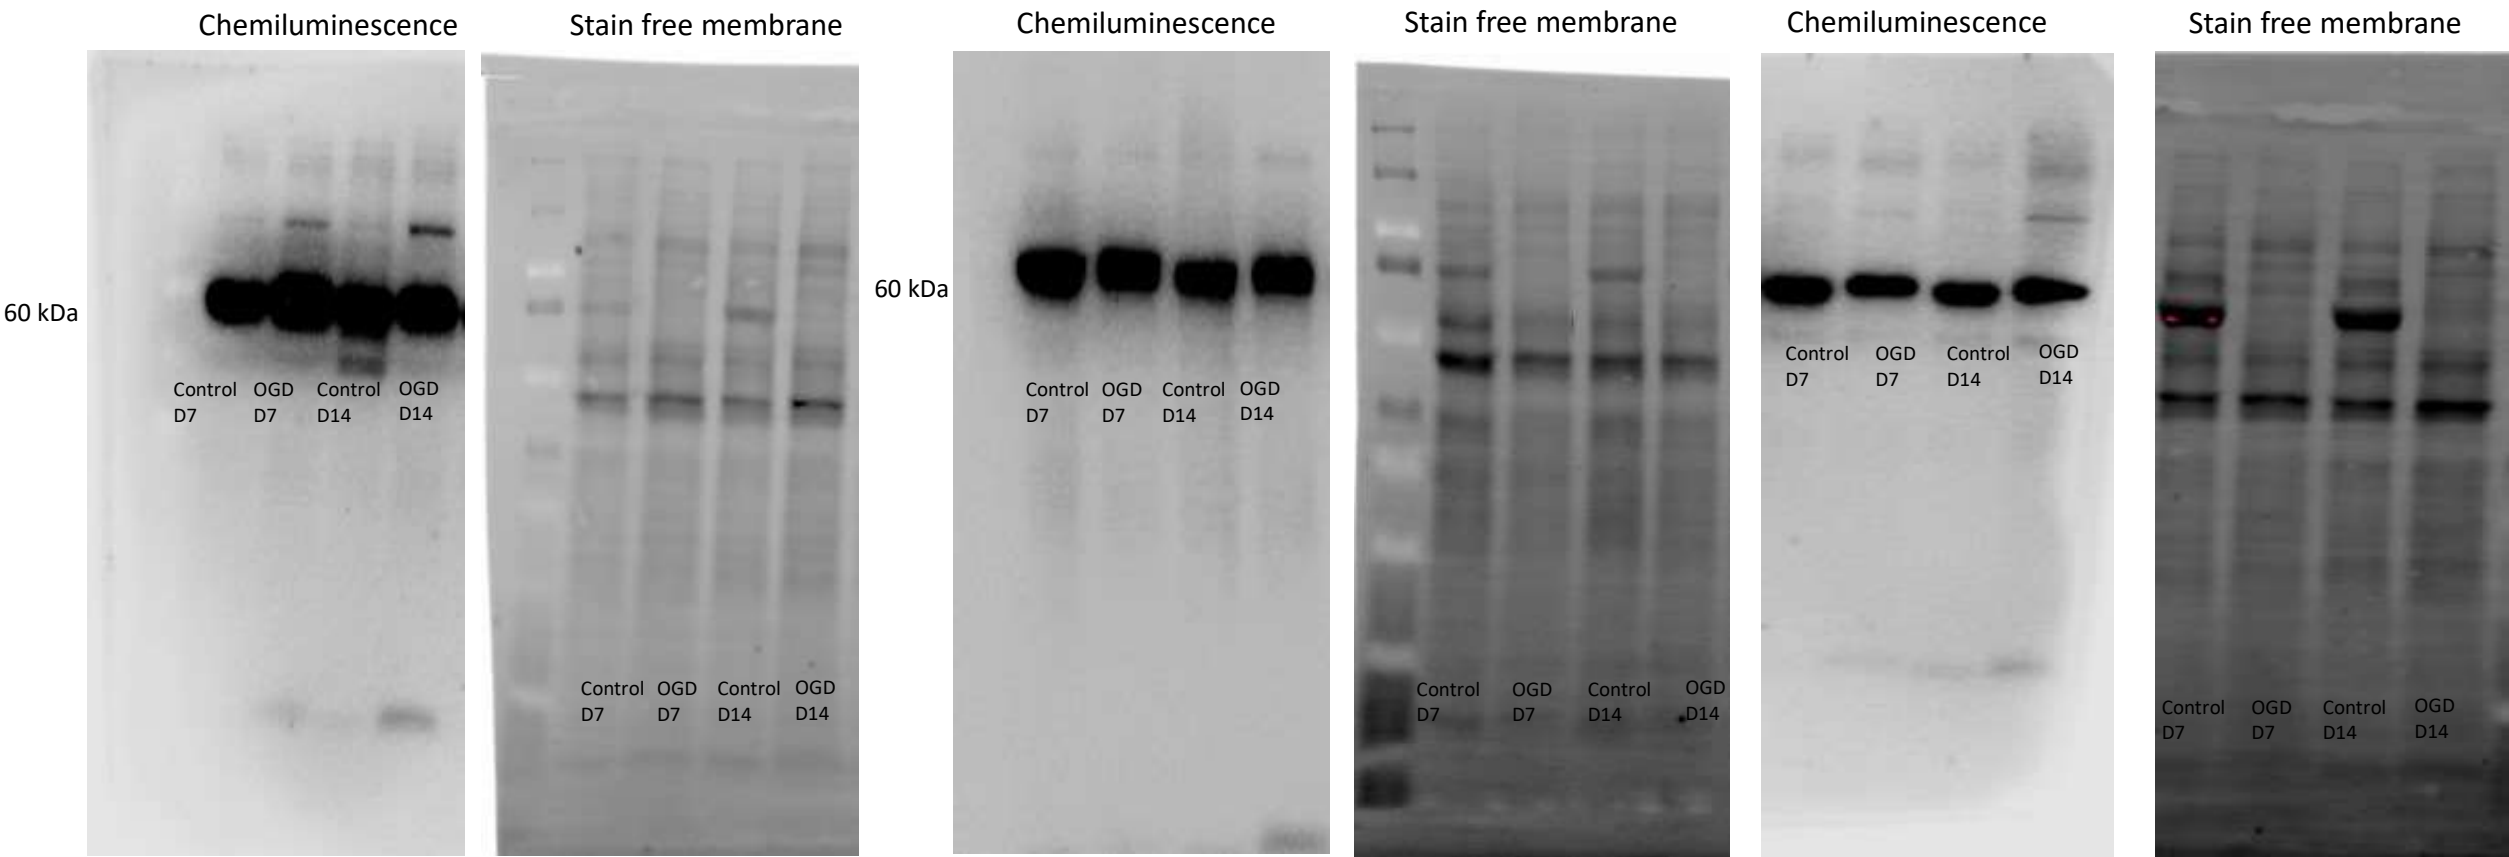

p62

Chemiluminescence

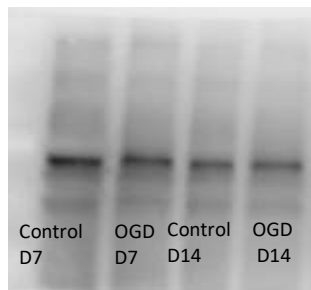

Stain free membrane

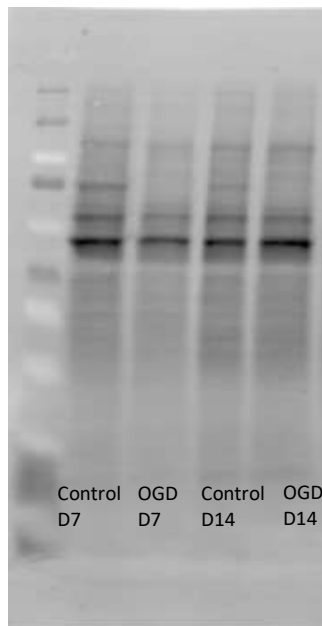

Chemiluminescence

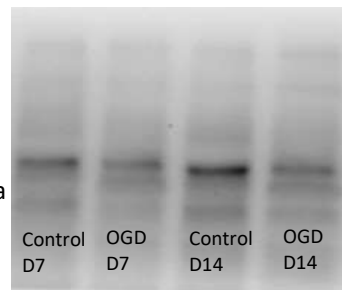

Stain free membrane

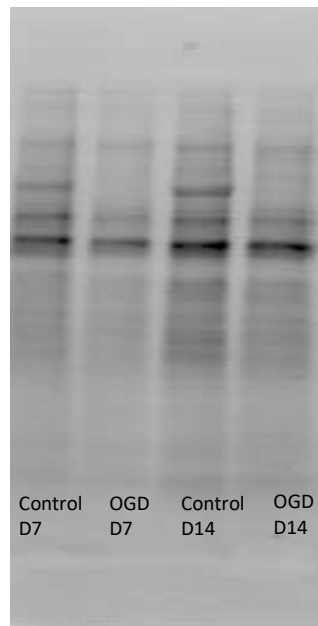

Chemiluminescence

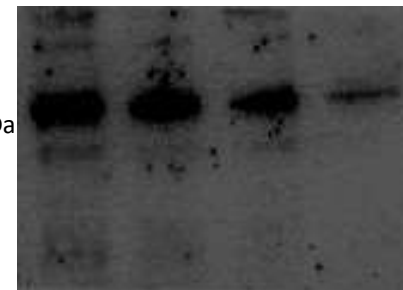

Stain free membrane

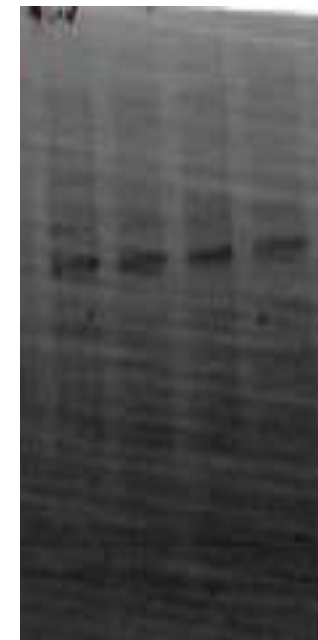

Control D7 OGD D7 Control D14 OGD D14

# LC3

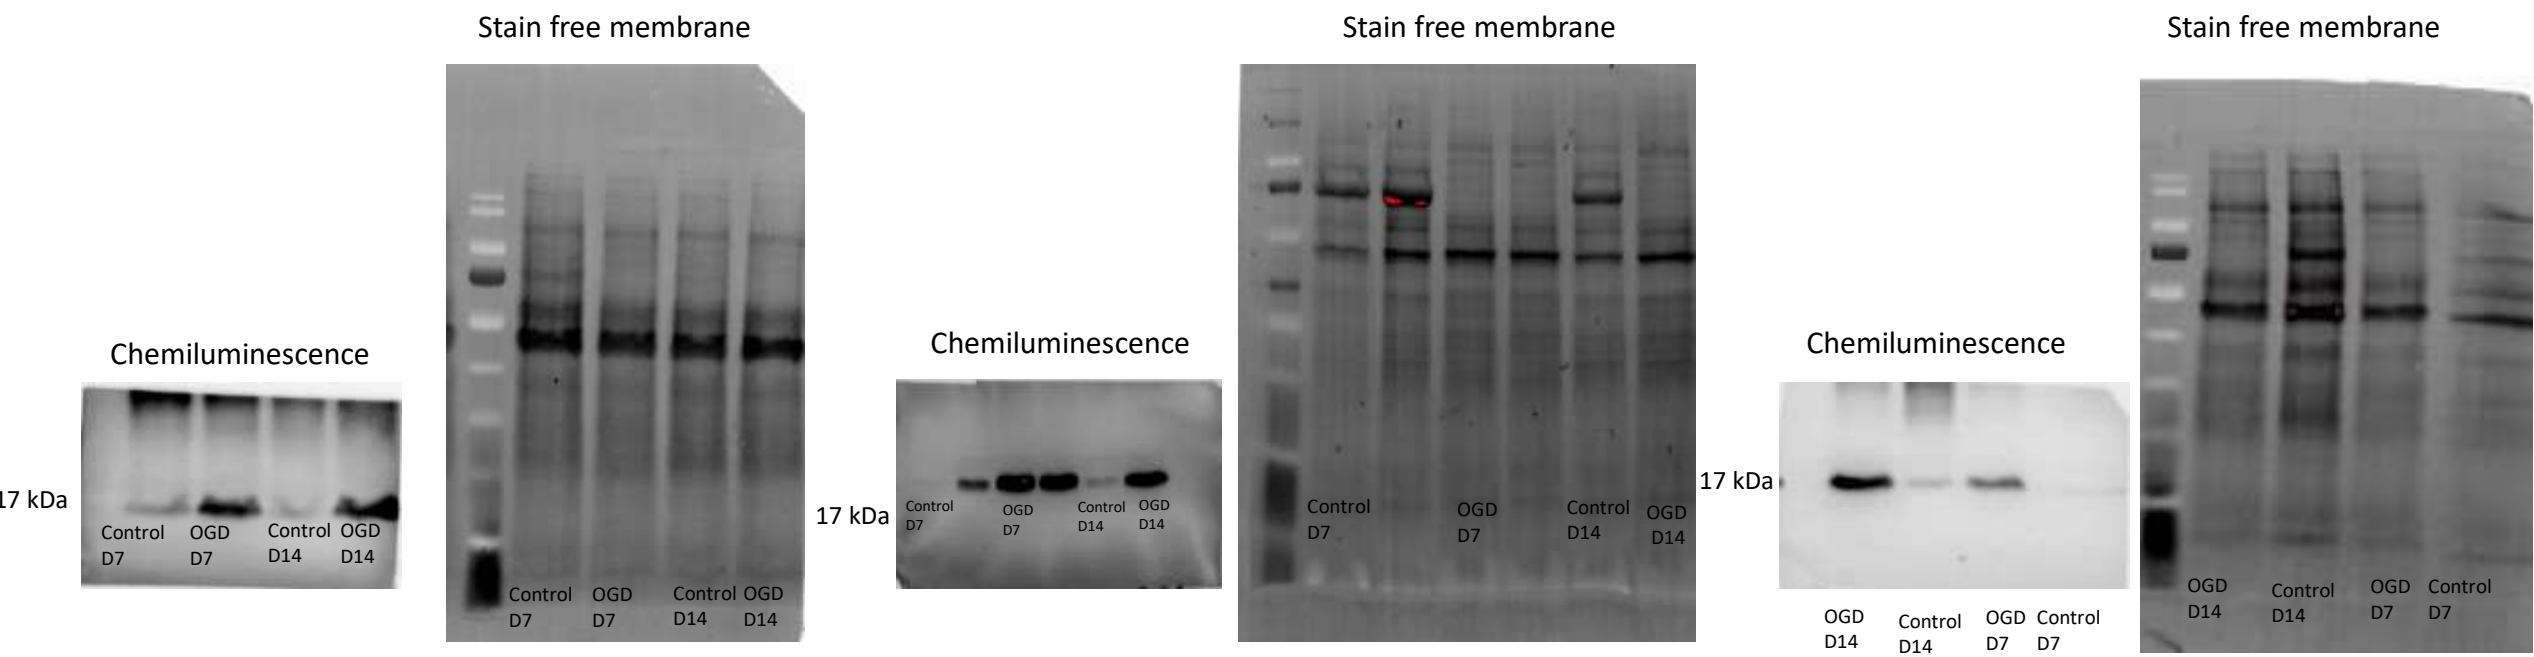

Supplement: s1 [file s1]
